# Supplementary material for: Protein Supplement Perceptions, Use, and Associated Performance in Young Lebanese Resistance-Training Athletes
Source: J Nutr Metab. 2022 Feb 18;2022:4150620. doi: 10.1155/2022/4150620 (PMC8881173; doi:10.1155/2022/4150620)
Supplement: Supplementary Materials — Supplementary Table 1: demographics of participants. Demographics and lifestyle characteristics of the participants were separated into two categories as supplement versus nonsupplement users. Supplementary Table 2: demographic and lifestyle characteristics of dietary supplement users. Comparison between the supplement users' category and protein consumption category was assessed to depict whether general supplementation or protein supplementation specifically would result in a significant difference among demographic and lifestyle characteristics that compared protein supplement versus nonprotein supplements users. Supplementary Table 3: nutritional knowledge, information sources, and awareness of health risks reported by dietary supplement users among resistance-trained individuals. The questions investigating nutrition knowledge were based on a previously validated questionnaire used to measure the nutrition knowledge for sport (NSKQ) in athletes. The minimum score that can be obtained was 0, whereas the maximum score that can be obtained was 53 based on the fact that the total number of questions to be answered was 53. Participants were then divided into 3 groups: poor, satisfactory, and high knowledge with an outcome score of less than 20, between 20 and 40, and more than 40, respectively. For further analysis, each category of the questionnaire was computed into different scores as per the total number of questions. Supplementary Figure 1: overall diagram of questions and answers of nutritional knowledge questionnaire of the participant. The figure describes in detail the outcomes of answers for each question of the nutrition-related knowledge using the nutrition for sports knowledge questionnaire (NSKQ). Supplementary Figure 2: individual performance between nonprotein supplement users and protein supplement users. To ease the view of individual performance among all participants, the figure illustrates a scattered plot of individual 1RM back squat (A), 1RM b [file 4150620.f1.pdf]

**Supplementary material**

Supplementary Table 1. Demographics of participants

|                    | Non-Supplement Users<br>n (%) | Supplement Users<br>n (%) | <i>P</i> value |
|--------------------|-------------------------------|---------------------------|----------------|
| Gender             |                               |                           |                |
| Male               | 21 (33.3)                     | 42 (66.7)                 | 0.21           |
| Female             | 17 (45.9)                     | 20 (54.1)                 |                |
| Age Group          |                               |                           |                |
| 20-29              | 28 (38.9)                     | 44 (61.1)                 | 0.769          |
| 30-40              | 10 (35.7)                     | 18 (64.3)                 |                |
| Level of Education |                               |                           |                |
| Brevet             | 1 (33.3)                      | 2 (66.7)                  | 0.224          |
| Lebanese Bachelor  | 1 (33.3)                      | 2 (66.7)                  |                |
| Technical Degree   | 0 (0.0)                       | 4 (100.0)                 |                |
| Bachelor           | 25 (47.2)                     | 28 (52.8)                 |                |
| Masters or Above   | 11 (29.7)                     | 26 (70.3)                 |                |
| Others             | 0 (0.0)                       | 0 (0.0)                   |                |
| Disease History    |                               |                           |                |
| None               | 34 (36.4)                     | 55 (61.8)                 | 1              |
| Yes                | 4 (45.5)                      | 7 (63.6)                  |                |
| Smoking status     |                               |                           |                |
| Yes                | 11 (39.3)                     | 17 (60.7)                 | 0.869          |
| No                 | 27 (37.5)                     | 45 (62.5)                 |                |
| Alcohol Intake     |                               |                           |                |
| Daily              | 0 (0.0)                       | 0 (0.0)                   | 0.777          |
| Weekly             | 11 (32.4)                     | 23 (67.6)                 |                |
| Monthly            | 9 (40.9)                      | 13 (66.7)                 |                |
| Yearly             | 4 (33.3)                      | 8 (66.7)                  |                |
| Never              | 14 (43.8)                     | 18 (56.3)                 |                |

*P* value: Pearson's Chi-square test and Fisher exact test with more than 20% of expected counts less than 5 (disease history, calories consumed daily, and grams of food protein consumed daily)

Supplementary Table 2. Demographic and lifestyle characteristics of dietary supplement users

|                                      | NPSU<br>n (%) | PSU<br>n (%) | <i>P</i> value |
|--------------------------------------|---------------|--------------|----------------|
| Gender                               |               |              |                |
| Male                                 | 28 (54.9)     | 35 (71.4)    | 0.087          |
| Female                               | 23 (45.1)     | 14 (28.6)    |                |
| Age Group                            |               |              |                |
| 20-29                                | 36 (70.6)     | 36 (73.5)    | 0.748          |
| 30-40                                | 15 (29.4)     | 13 (26.5)    |                |
| Level of Education                   |               |              |                |
| Brevet                               | 2 (3.9)       | 1 (2.0)      | 0.196          |
| Lebanese Bachelor                    | 2 (3.9)       | 1 (2.0)      |                |
| Technical Degree                     | 0 (0.0)       | 4 (8.2)      |                |
| Bachelor                             | 30 (58.8)     | 23 (436.9)   |                |
| Masters or Above                     | 17 (33.3)     | 20 (40.8)    |                |
| Others                               | 0 (0.0)       | 0 (0.0)      |                |
| Disease History                      |               |              |                |
| None                                 | 45 (88.2)     | 44 (49.4)    | 0.803          |
| Yes                                  | 6 (11.8)      | 5 (45.5)     |                |
| Smoking status                       |               |              |                |
| Yes                                  | 14 (27.5)     | 14 (28.6)    | 0.901          |
| No                                   | 37 (72.5)     | 35 (71.4)    |                |
| Alcohol Intake                       |               |              |                |
| Daily                                | 0 (0.0)       | 0 (0.0)      | 0.779          |
| Weekly                               | 18 (35.3)     | 16 (32.7)    |                |
| Monthly                              | 12 (23.5)     | 10 (20.4)    |                |
| Yearly                               | 7 (13.7)      | 5 (10.2)     |                |
| Never                                | 14 (27.5)     | 18 (36.7)    |                |
| Type of diet                         |               |              |                |
| Balanced                             | 41 (80.4)     | 40 (81.6)    | 0.67           |
| Vegetarian                           | 1 (2.0)       | 1 (2.0)      |                |
| Vegan                                | 1 (2.0)       | 0 (0.0)      |                |
| Ketogenic                            | 0 (0.0)       | 2 (4.1)      |                |
| Carb Cycling                         | 2 (3.9)       | 1 (2.0)      |                |
| Flexible Dieting                     | 2 (3.9)       | 3 (6.1)      |                |
| Low Carb                             | 4 (7.8)       | 1 (2.0)      |                |
| Pescatarian                          | 0 (0.0)       | 1 (2.0)      |                |
| Calories Consumed daily              |               |              |                |
| I don't Know                         | 15 (29.4)     | 14 (28.6)    | 0.087          |
| <1000                                | 1 (2.0)       | 1 (2.0)      |                |
| 1001-1500                            | 11 (21.6)     | 2 (4.1)      |                |
| 1501-2000                            | 14 (27.5)     | 15 (30.6)    |                |
| 2001-2500                            | 4 (7.8)       | 8 (16.3)     |                |
| 2501-3000                            | 3 (5.9)       | 6 (12.2)     |                |
| 3001-3500                            | 1 (2.0)       | 3 (6.1)      |                |
| 3501-4000                            | 2 (3.9)       | 0 (0.0)      |                |
| Grams of food protein consumed daily |               |              |                |
| I don't Know                         | 30 (58.8)     | 18 (36.7)    | 0.136          |
| <50                                  | 1 (2.0)       | 0 (0.0)      |                |
| 51-100                               | 7 (13.7)      | 10 (20.4)    |                |
| 101-150                              | 8 (15.7)      | 14 (28.6)    |                |
| 151-200                              | 4 (7.8)       | 6 (12.2)     |                |
| 201-250                              | 1 (2.0)       | 0 (0.0)      |                |
| >250                                 | 0 (0.0)       | 1 (2.0)      |                |

*P* value: Pearson's Chi-square test and Fisher exact test with more than 20% of expected counts less than 5 (level of education, calories consumed daily, and grams of food protein consumed daily).

Supplemental Table 3. Nutritional knowledge, information sources, and awareness of health risk reported by dietary supplement users among resistance trained individuals

|                                 | NPSU<br>n (%) | PSU<br>n (%) | <i>P</i><br>value |
|---------------------------------|---------------|--------------|-------------------|
| Knowledge score                 |               |              |                   |
| Poor: < 20                      | 6<br>(11.8)   | 6<br>(12.2)  | 0.733             |
| Satisfactory: 20-39             | 43<br>(84.3)  | 39<br>(79.6) |                   |
| High: ≥ 40                      | 2 (3.9)       | 4 (8.2)      |                   |
| Nutritional Information sources |               |              |                   |
| Internet                        | 28<br>(54.9)  | 18<br>(36.7) | 0.312             |
| Social media                    | 4 (7.8)       | 3 (6.1)      |                   |
| Sport coach                     | 13<br>(25.5)  | 20<br>(40.8) |                   |
| Dietitian                       | 4 (7.8)       | 4 (8.2)      |                   |
| Shop representative             | 1 (2.0)       | 2 (4.1)      |                   |
| Peers                           | 1 (2.0)       | 0 (0.0)      |                   |
| Family                          | 0 (0.0)       | 2 (4.1)      |                   |
| Awareness of Health Risks       |               |              |                   |
| None                            | 24<br>(47.1)  | 17<br>(34.7) | 0.666             |
| Excess Calcium Loss             | 2 (3.9)       | 3 (6.1)      |                   |
| Harm Kidney Function            | 23<br>(45.1)  | 26<br>(53.1) |                   |
| Heavy Metal Contamination       | 0 (0.0)       | 1 (2.0)      |                   |
| Other                           | 2 (3.9)       | 2 (4.1)      |                   |

*P* value: Fisher exact test

7 Supplementary Figure 1 : Overall diagram of questions and answers of nutritional knowledge questionnaire of the  
8 participant

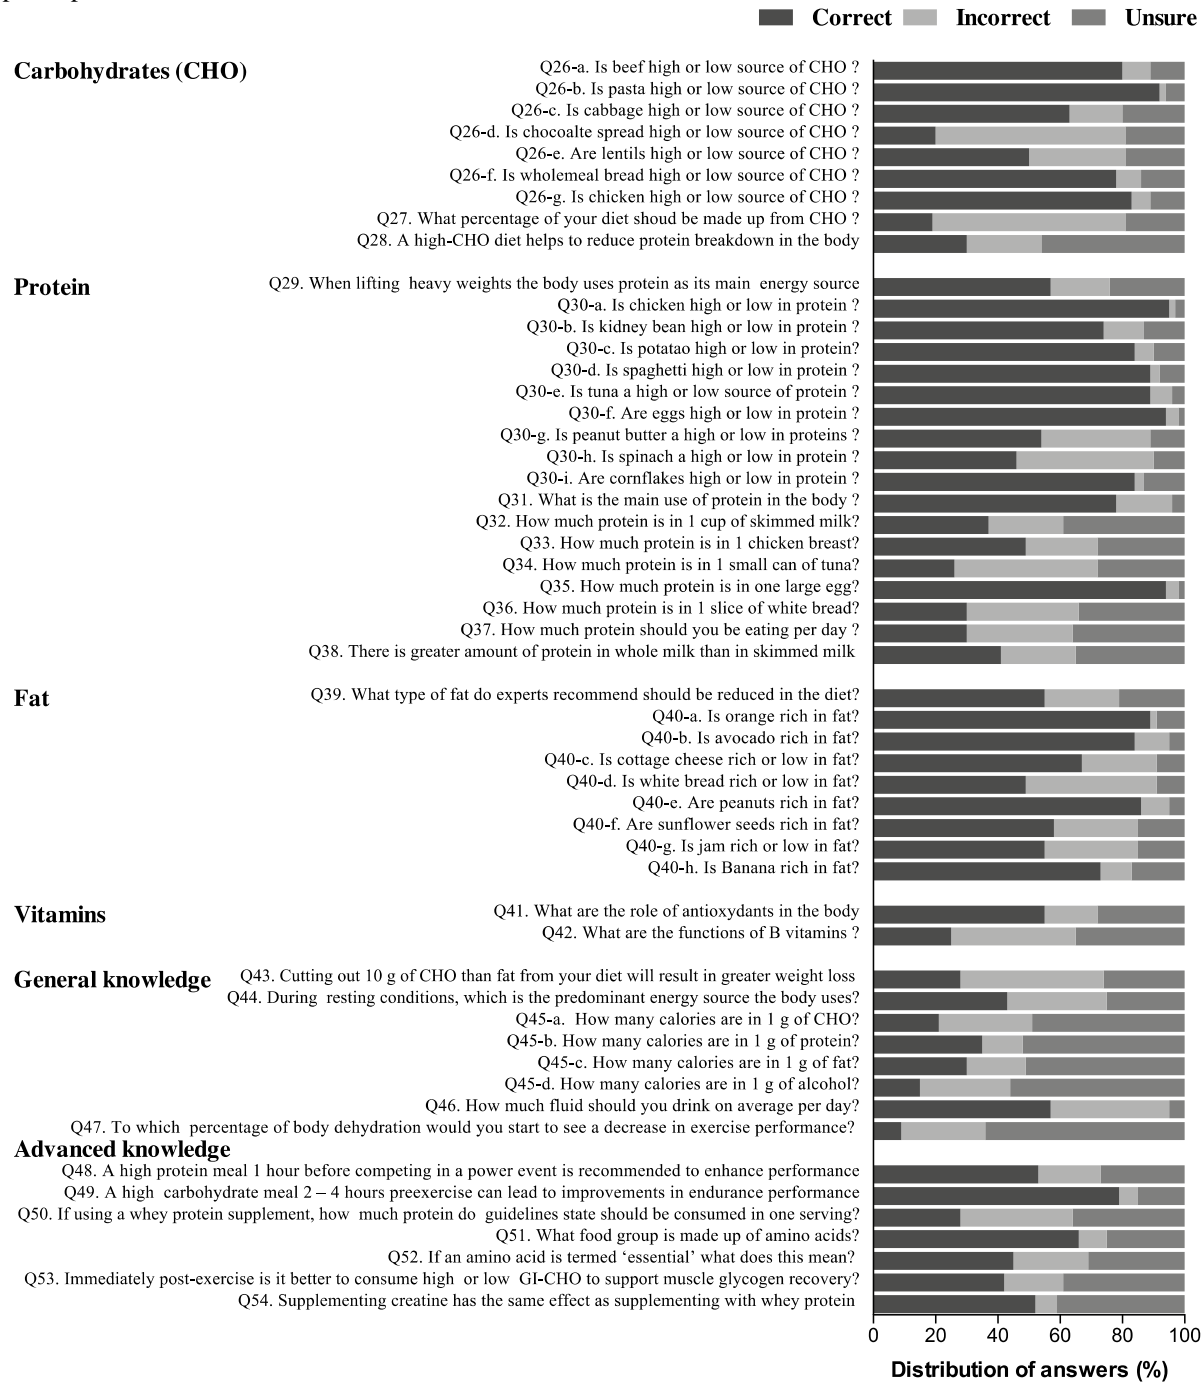

Supplementary Figure 2. Individual performance between non-protein supplement users and protein supplement users.

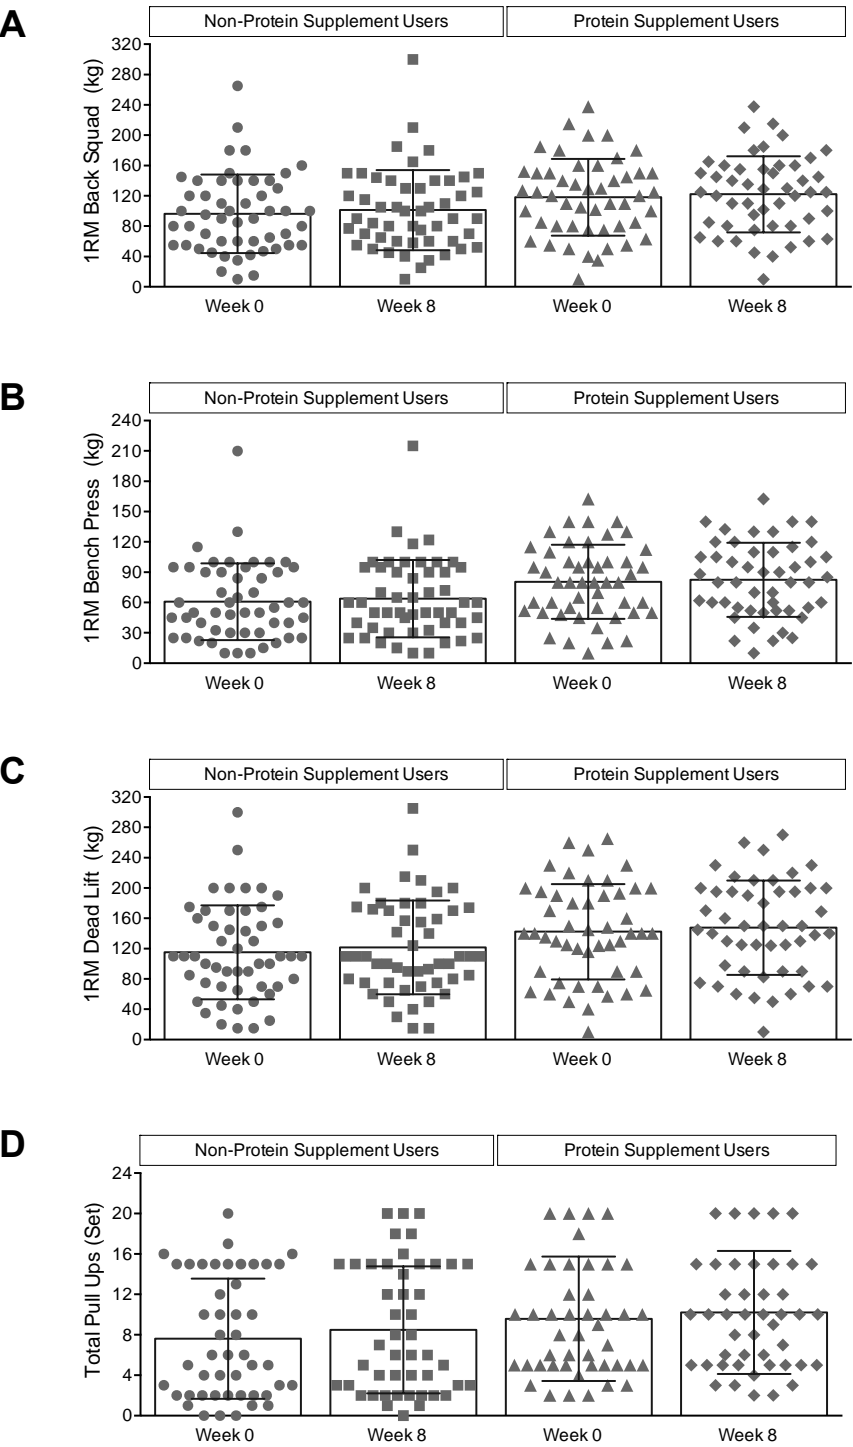

11  
12
